# Supplementary material for: Study of the lithium/nickel ions exchange in the layered LiNi0.42Mn0.42Co0.16O2 cathode material for lithium ion batteries: experimental and first-principles calculations
Source: Royal Society of Chemistry journal article supplement (doi:10.1039/c3ee42398k), 2013-11-29
Supplement: c3ee42398k.pdf [file c3ee42398k.pdf]

## Supplemental information

**Haijun Yu<sup>‡a</sup>, Yumin Qian<sup>‡a</sup>, Minoru Otani<sup>b,c</sup>, Daiming Tang<sup>d</sup>, Shaohua Guo<sup>a</sup>, Yanbei Zhu<sup>e</sup> and Haoshen Zhou<sup>\*a,f</sup>**

<sup>a</sup> Energy Technology Research Institute, National Institute of Advanced Industrial Science and Technology (AIST), Umezono 1-1-1, Tsukuba, 305-8568, Japan. Fax: 029-861-3489; Tel: 029-861-5782; E-mail: hs.zhou@aist.go.jp

<sup>b</sup> Elements Strategy Initiative for Catalysts and Batteries (ESICB), Kyoto University Katsura, Kyoto 615-8520, Japan

<sup>c</sup> Nanosystem Research Institute, National Institute of Advanced Industrial Science and Technology (AIST), Umezono 1-1-1, Tsukuba, 305-8568, Japan. Fax: 029-861-3171; Tel: 029-861-3171;

<sup>d</sup> International Center for Young Scientists (ICYS) and World Premier International (WPI) Center for Materials, National Institute for Materials Science (NIMS), Namiki 1-1, Tsukuba, 305-0044, Japan;

<sup>e</sup> National Metrology Institute of Japan, National Institute of Advanced Industrial Science and Technology, Umezono 1-1-1, Tsukuba, 305-8568, Japan.

<sup>f</sup> National Laboratory of Solid state Microstructures & Department of Energy Science and Engineering, Nanjing University, Nanjing, 210093, China.

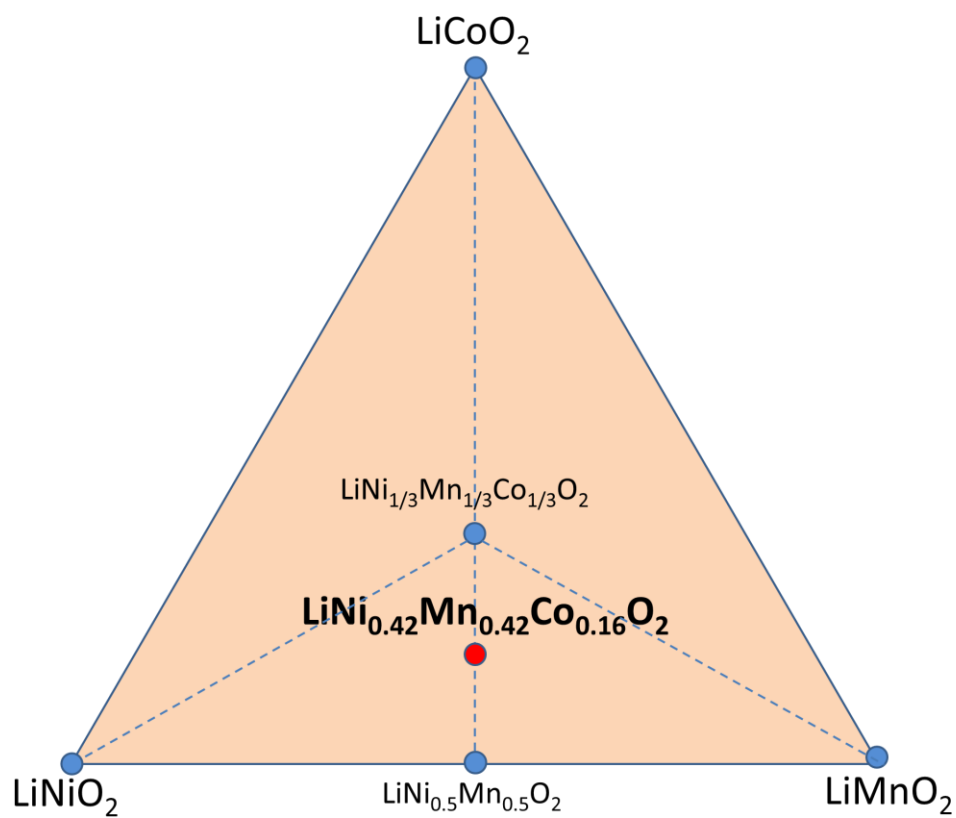

**Figure S1** The composition of  $\text{LiMn}_{0.42}\text{Ni}_{0.42}\text{Co}_{0.16}\text{O}_2$  electrode material in this study

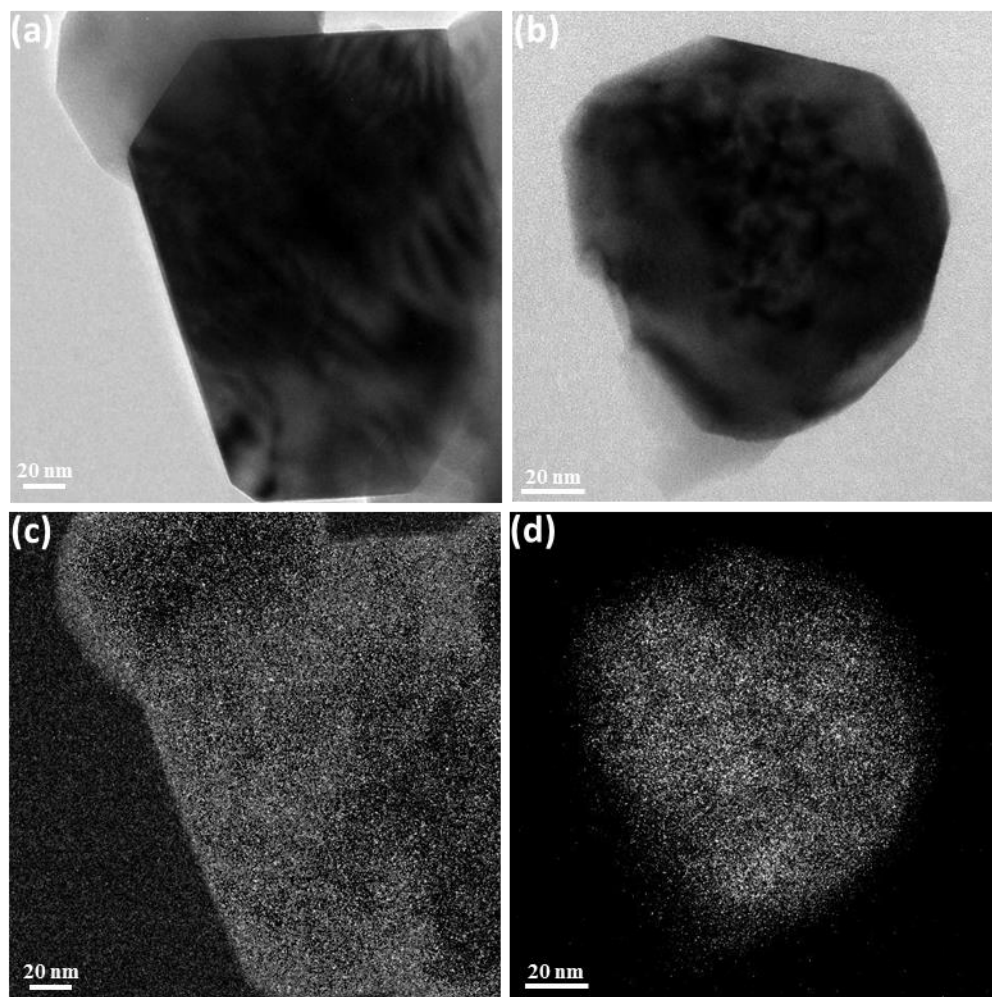

**Figure S2** (a) and (b) High-resolution transmission electron microscopy image of Sample A and Sample B, respectively; (c) and (d) Ni EELS maps on the single particle of Sample A and Sample B, respectively.

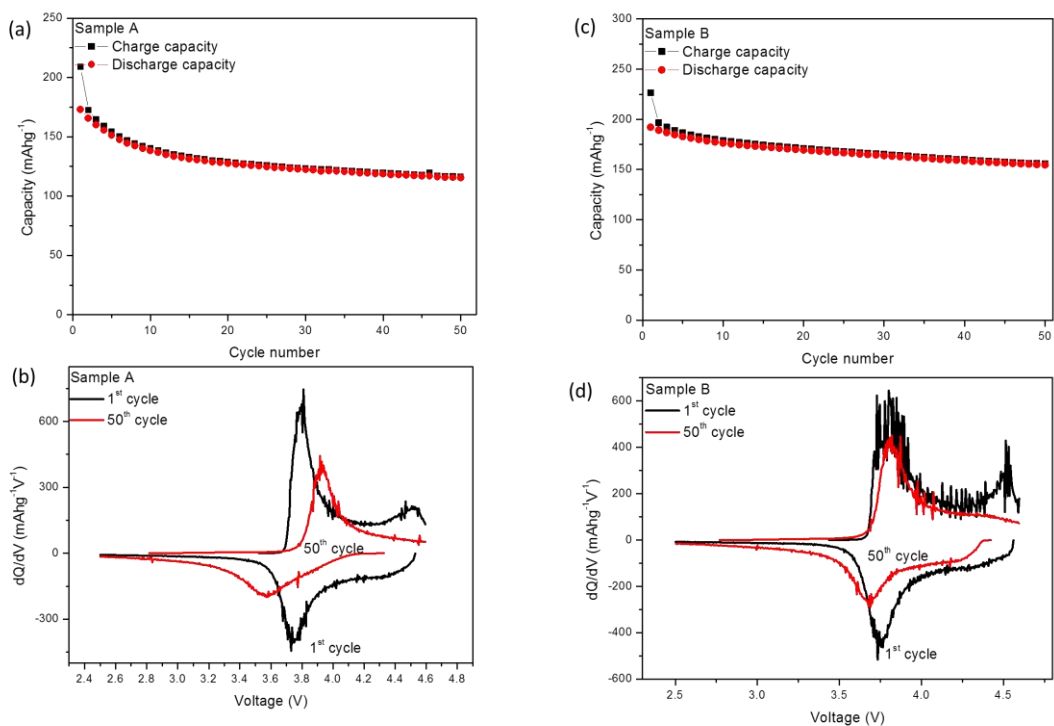

**Figure S3** Electrochemical performance of Sample A and Sample B with 4.6 V cut-off voltage and 20 mA/g current density: (a) and (b), cycle life and dQ/dV curves of Sample A; (c) and (d), cycle life and dQ/dV curves of Sample B. The discharge capacity of the 1<sup>st</sup> cycle for Sample A and Sample B are 173 mAh/g and 191 mAh/g, respectively. The cycle life of Sample A and Sample B after 50 times charge and discharge processes are 66% and 81%, respectively.

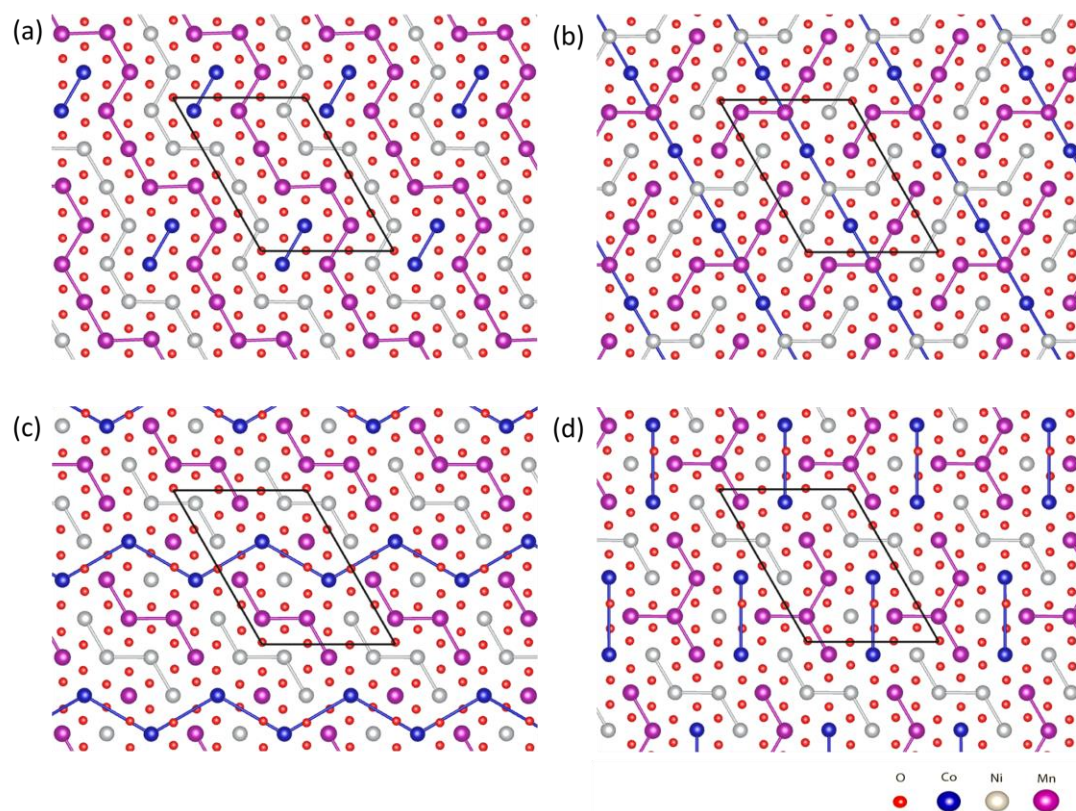

**Figure S4** Different models for the cation ordering of transitional metal layer adopted in the calculation: (a) Co ions ordering with ordering parameter of 1; (b) Co ions ordering with ordering parameter of 2; (c) Co ions ordering with ordering parameter of  $\sqrt{3}$ ; (d) Co ions ordering with the same ordering parameter of  $\sqrt{3}$  as (c), but different pattern.

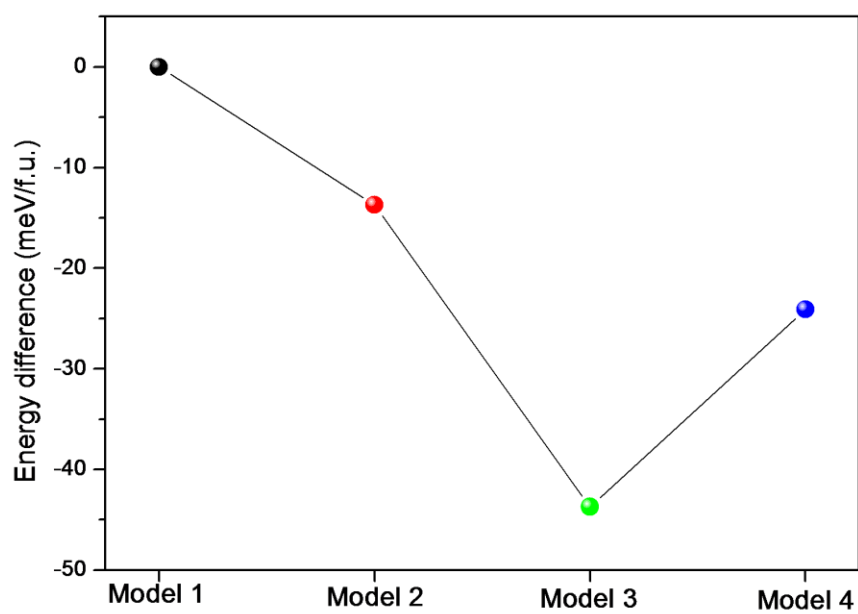

**Figure S5** The calculated total energy per formula unit based on the different cation ordering in Figure S3a, b, c and d (0meV, -13.7meV, -43.7meV and -24.1meV per formula unit (f.u.)).

**Table S1** Rietveld refinement atomic coordinates for Sample A prepared by the solid-state reaction method based on the X-ray powder diffraction data.

| Atom | Wyck position | x     | y     | z         | Biso* | Occupancy |
|------|---------------|-------|-------|-----------|-------|-----------|
| Mn   | 3a            | 0.000 | 0.000 | 0.000     | 0.11  | 0.42      |
| Co   | 3a            | 0.000 | 0.000 | 0.000     | 0.11  | 0.16      |
| Ni   | 3a            | 0.000 | 0.000 | 0.000     | 0.11  | 0.357(4)  |
| Li   | 3a            | 0.000 | 0.000 | 0.000     | 0.11  | 0.062(4)  |
| Ni   | 3b            | 0.000 | 0.000 | 0.500     | 0.14  | 0.062(4)  |
| Li   | 3b            | 0.000 | 0.000 | 0.500     | 0.14  | 0.947(4)  |
| O    | 6c            | 0.000 | 0.000 | 0.2582(1) | 0.33  | 1.0       |

\* Fixed

**Table S2** Rietveld refinement atomic coordinates for Sample B prepared by the co-precipitation method based on the X-ray powder diffraction data.

| Atom | Wyck position | x     | y     | z         | Biso* | Occupancy |
|------|---------------|-------|-------|-----------|-------|-----------|
| Mn   | 3a            | 0.000 | 0.000 | 0.000     | 0.11  | 0.45      |
| Co   | 3a            | 0.000 | 0.000 | 0.000     | 0.11  | 0.15      |
| Ni   | 3a            | 0.000 | 0.000 | 0.000     | 0.11  | 0.352(3)  |
| Li   | 3a            | 0.000 | 0.000 | 0.000     | 0.11  | 0.037(3)  |
| Ni   | 3b            | 0.000 | 0.000 | 0.500     | 0.14  | 0.037(3)  |
| Li   | 3b            | 0.000 | 0.000 | 0.500     | 0.14  | 1.082(3)  |
| O    | 6c            | 0.000 | 0.000 | 0.2599(1) | 0.33  | 1.0       |

\* Fixed
